# Supplementary material for: Multicomponent LBSap vaccine displays immunological and parasitological profiles similar to those of Leish-Tec® and Leishmune® vaccines against visceral leishmaniasis
Source: PubMed Central journal article supplement (PMC5006379; doi:10.1186/s13071-016-1752-6), 2016-08-30

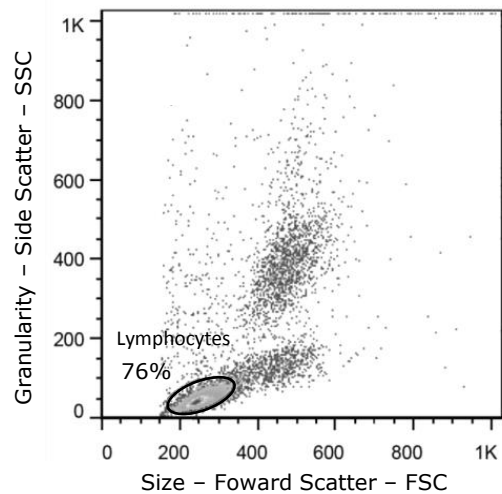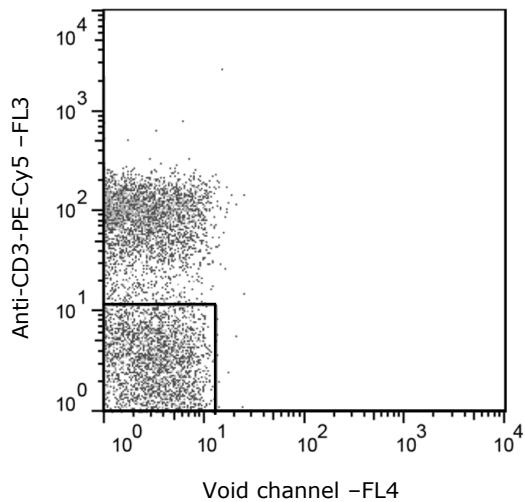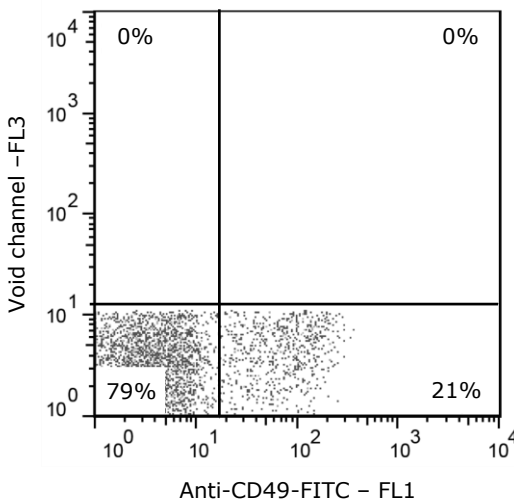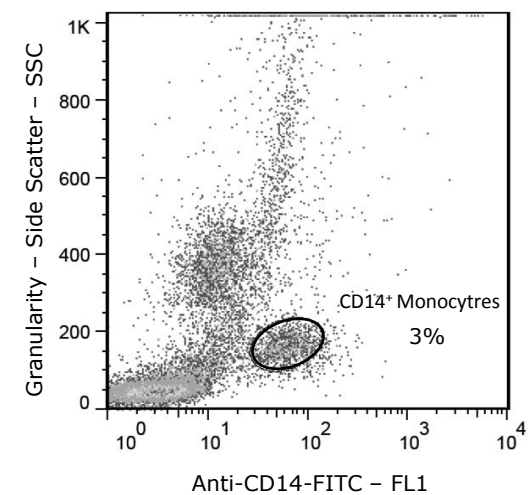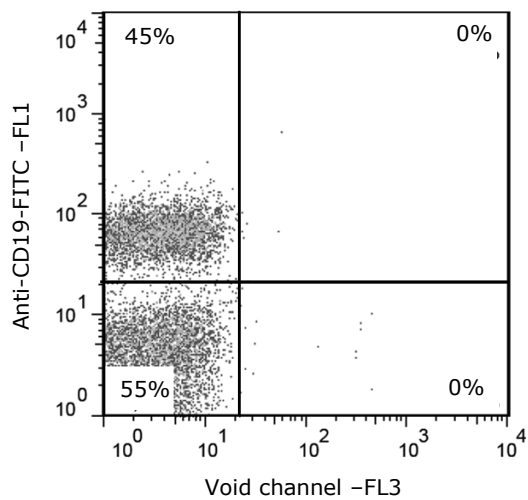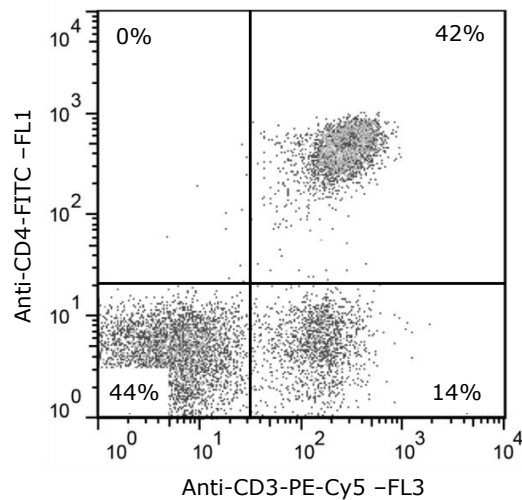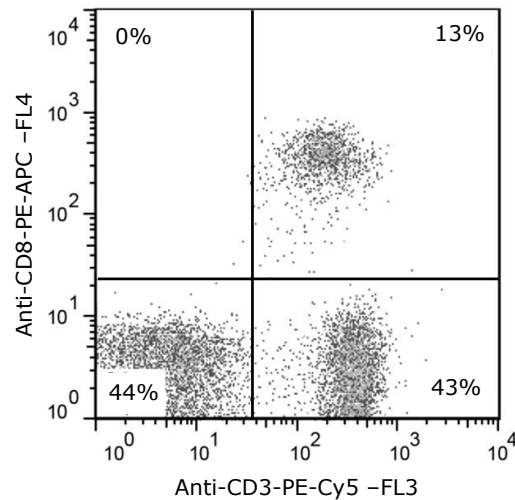

Supplement: 13071_2016_1752_MOESM1_ESM.pdf [file 13071_2016_1752_MOESM1_ESM.pdf]
